# Supplementary material
Source: PubMed Central journal article supplement (PMC5641232)
Supplement: NIHMS873622-supplement-s1.pdf [file NIHMS873622-supplement-s1.pdf]

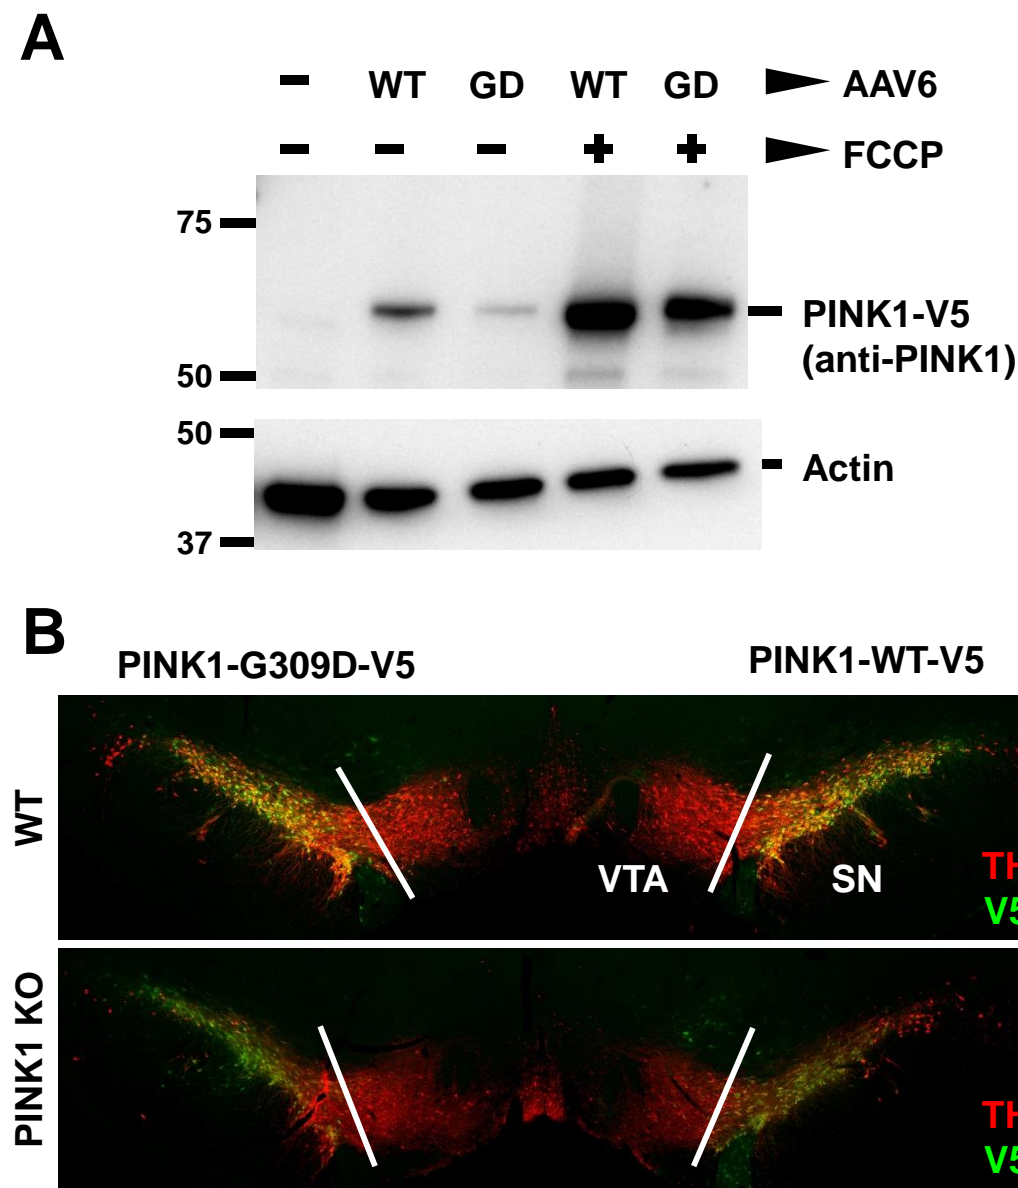

**Supplemental Figure 1.** Reintroduction of PINK1 in neurons using AAV vectors. (A) Western blot of AAV6-PINK1-WT-V5 or AAV6-PINK1-G309D-V5 (GD) expression in primary hippocampal neurons without or with overnight treatment with the mitochondrial uncoupling agent FCCP (probed with anti-PINK1 antibody). Relative loading amounts are suggested after reprobing for total actin content. (B) PINK1-V5 expression (green) in WT (top panel) or PINK1 KO (bottom panel) rat ventral midbrain following stereotaxic injection of AAV6-PINK1-V5 vectors into the SNc. Counterstaining for TH (red) indicates the location of DA neurons and processes. The white bars approximate the anatomical border between the SN and VTA.
